# Supplementary material
Source: publisher site journal article supplement (https://www.dovepress.com/article/464004)
Supplement: Supplementary file 1 [file get_supplementary_file.php]

**Table S1 Primer information**

|  | Direction | Sequence (5’-3’) |
| --- | --- | --- |
| miR-185-5p | Forward | TGGAGAGAAAGGCAGTTCCTG |
|  | Reverse | CTCTACAGCTATATTGCCAGCCAC |
| U6 | Forward | TGCGGGTGCTCGCTTCGGCAGC |
|  | Reverse | CCAGTGCAGGGTCCGAGGT |

**Table S2 Hemodynamics and cardiac function parameters**

|  |  | Sham | TAC | Apigenin+L | Apigenin+H |
| --- | --- | --- | --- | --- | --- |
| LVESP (mmHg) | Rep1 | 115.4 | 82.3 | 95.2 | 118.5 |
|  | Rep2 | 121.8 | 84.7 | 101.4 | 122.4 |
|  | Rep3 | 135.3 | 86.3 | 96.5 | 113.9 |
|  | Rep4 | 109.7 | 71.2 | 103.2 | 114.7 |
|  | Rep5 | 126.5 | 83.4 | 101.2 | 105.8 |
|  | Rep6 | 126.4 | 68.6 | 109.4 | 117.5 |
| FS (%) | Rep1 | 49.5 | 29.7 | 35.1 | 46.5 |
|  | Rep2 | 51.2 | 29.4 | 35.9 | 49.7 |
|  | Rep3 | 56.4 | 15.8 | 38.2 | 51.3 |
|  | Rep4 | 37.8 | 26.7 | 41.3 | 48.9 |
|  | Rep5 | 41.3 | 16.1 | 35.7 | 36.4 |
|  | Rep6 | 46.1 | 25.8 | 39.8 | 39.7 |
| LVEDP (mmHg) | Rep1 | 4.3 | 12.3 | 9.3 | 6.8 |
|  | Rep2 | 3.8 | 10.5 | 9.6 | 5.1 |
|  | Rep3 | 5.6 | 19.8 | 9.2 | 6.3 |
|  | Rep4 | 6.7 | 17.3 | 8.9 | 5.4 |
|  | Rep5 | 4.8 | 11.7 | 7.5 | 6.2 |
|  | Rep6 | 4.1 | 10.1 | 8.3 | 6.9 |
| CK-MB (U/ml) | Rep1 | 1.1 | 5.8 | 2.8 | 3.2 |
|  | Rep2 | 1.0 | 5.8 | 3.9 | 2.6 |
|  | Rep3 | 1.0 | 3.9 | 3.4 | 1.9 |
|  | Rep4 | 1.7 | 6.4 | 4.1 | 3.1 |
|  | Rep5 | 1.6 | 6.9 | 3.4 | 1.7 |
|  | Rep6 | 1.1 | 4.3 | 3.8 | 2.7 |
| LDH (U/L) | Rep1 | 876 | 3548 | 1702 | 1016 |
|  | Rep2 | 1247 | 2659 | 1755 | 1382 |
|  | Rep3 | 860 | 2459 | 1919 | 1215 |
|  | Rep4 | 1360 | 3073 | 1578 | 1758 |
|  | Rep5 | 989 | 2503 | 2589 | 1978 |
|  | Rep6 | 871 | 3503 | 2099 | 1577 |
